# Supplementary material for: Time course of traumatic neuroma development
Source: PubMed Central journal article supplement (PMC6047790; doi:10.1371/journal.pone.0200548), 2018-07-16
Supplement: pone.0200548.s001.pdf [file pone.0200548.s001.pdf]

# S1 Supporting Information

## S1 Figure

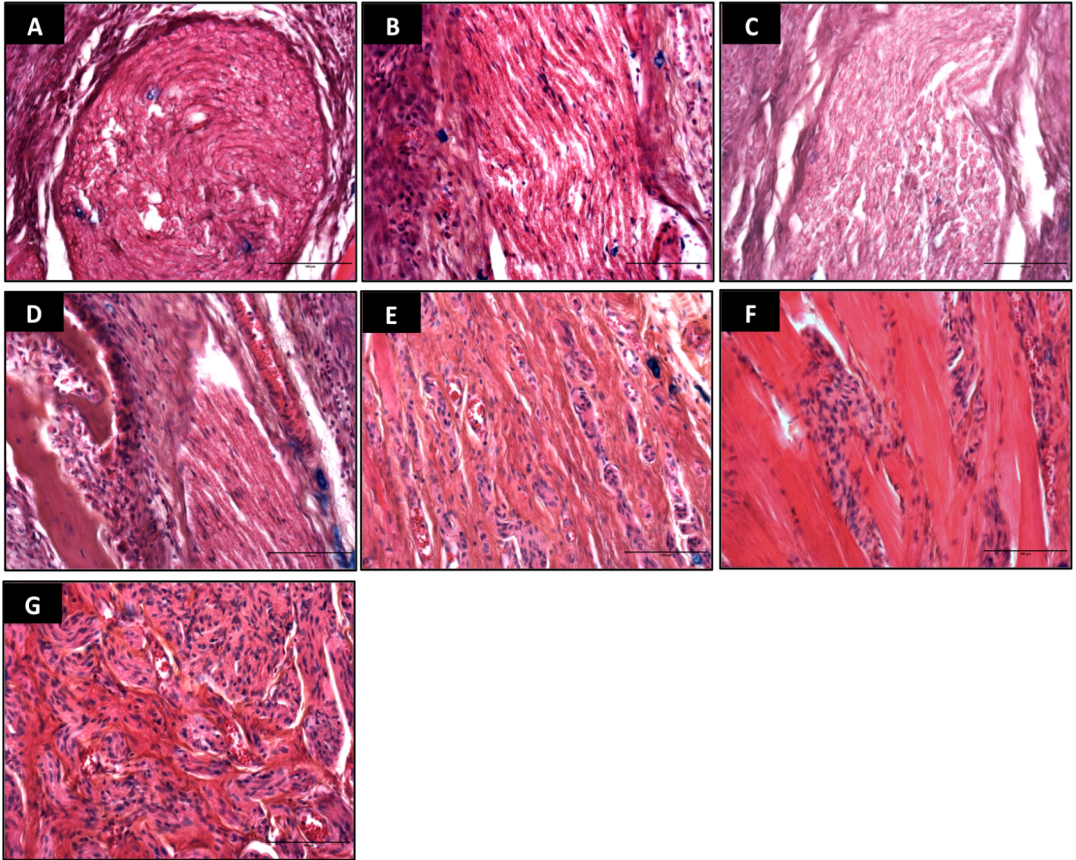

**Fig S1 – Representative images showing features of general morphology of ulnar, median and radial nerves branches stained with AB&OG. (A, B, C and D) Longitudinal and transversal cut of nerve branches demonstrating normal features (N0), degenerating axons (N1) and/or axonal sprouts (N2). Nerves with advanced pathological features: (E) unorganized axons bundled in connective tissue (N3), (F) unorganized axon ramifications in muscle (N4) and (G) neuroma - highly unorganized axons in tissue (N5). All images have 20x magnification with scale bar = 100 $\mu$ m.**
